# Supplementary material for: Exploration of plant transcriptomes reveals five putative novel poleroviruses and an enamovirus
Source: Research Square preprint supplement (doi:10.21203/rs.3.rs-977606/v1), 2021-10-19
Supplement: Supplementary file 1 [file 54bccb0627180a16bed8082f.docx]

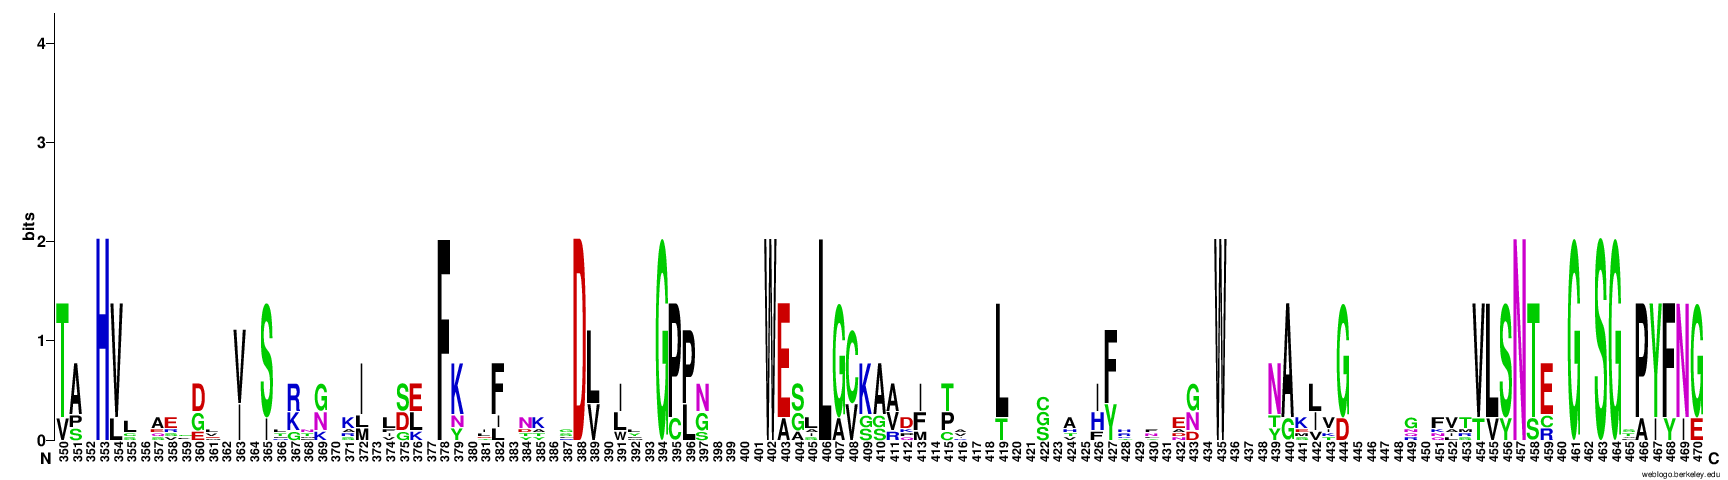

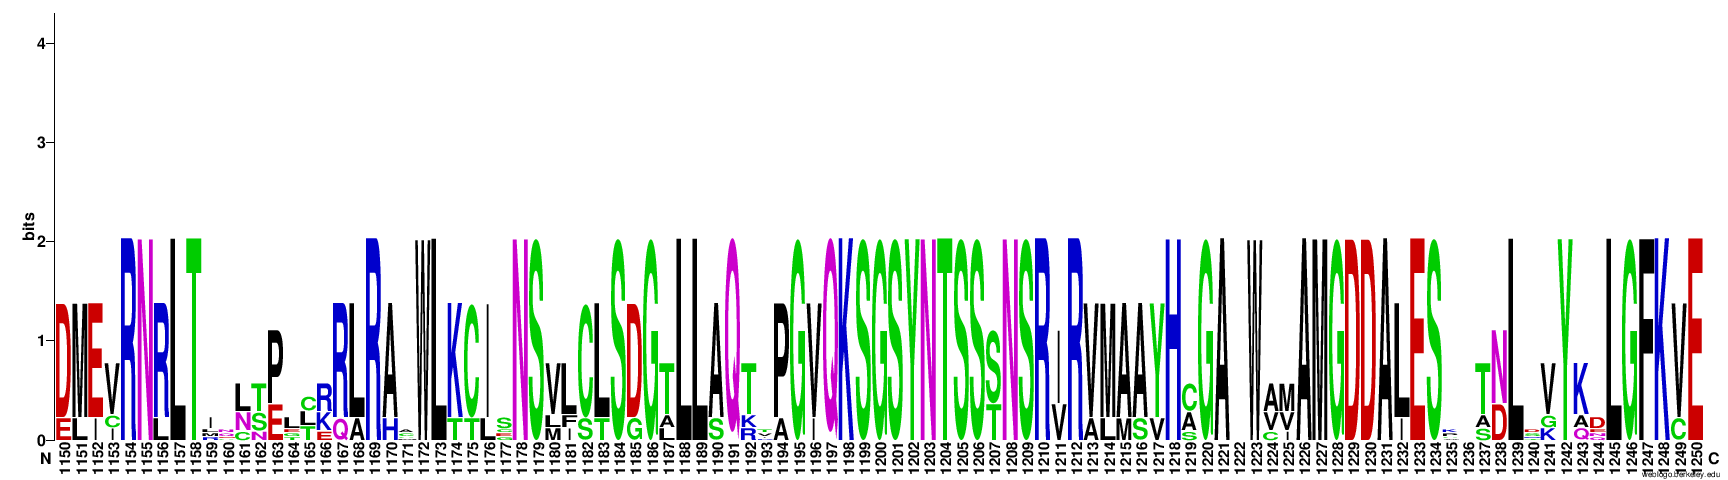


**A**

**B**

**Fig. S1** Conserved H(X25)D(X70–80)GXSG domain **(A)** and GXXXTXXXN(X25–40)GDD motif **(B)** determined in the P1 and P1−P2 proteins, respectively of the identified viruses. The sequence logos were generated using the webserver WebLogo 3.
